# Supplementary material
Source: HighWire-hosted journal article supplement (https://delf06.com/highwire/filestream/93905/field_highwire_adjunct_files/1/bmjopen_supplementary_tables_000142.pdf)
Supplement: bmjopen_supplementary_tables_000142.pdf [file bmjopen_supplementary_tables_000142.pdf]

**Supplementary files:**

Supplementary table 1: Balance, reaction time and flexibility of jockeys and track-work riders in Tasmania

| <b>Study factor</b>                                    | <b>Jockeys<br/>(n=8)</b> | <b>Track-work riders<br/>(n=20)</b> |
|--------------------------------------------------------|--------------------------|-------------------------------------|
| Balance left (sec)                                     |                          |                                     |
| Median                                                 | 54.96                    | 25.11                               |
| Mean ( $\pm$ SD)                                       | 69.75 (46.03)            | 76.77 (94.42)                       |
| Range                                                  | 10.65, 123.45            | 4.21, 300.66                        |
| Balance right (sec)                                    |                          |                                     |
| Median                                                 | 57.39                    | 32.14                               |
| Mean ( $\pm$ SD)                                       | 72.77 (35.45)            | 70.04 (76.81)                       |
| Range                                                  | 36.66, 117.90            | 2.85, 202                           |
| Best reaction time (m.sec <sup>-1</sup> ) <sup>a</sup> |                          |                                     |
| Median                                                 | 171                      | 154                                 |
| Mean ( $\pm$ SD)                                       | 172.50 (15.28)           | 161.86 (14.70)                      |
| Range                                                  | 156, 200                 | 151, 191                            |
| Mean reaction time (m.sec <sup>-1</sup> ) <sup>a</sup> |                          |                                     |
| Median                                                 | 192.45                   | 214.70                              |
| Mean ( $\pm$ SD)                                       | 204.37 (43.95)           | 213.66 (33.23)                      |
| Range                                                  | 173.4, 291               | 175.4, 276.3                        |
| Flexibility (cm)                                       |                          |                                     |
| Median                                                 | 8.25                     | 11.70                               |
| Mean ( $\pm$ SD)                                       | 9.48 (10.00)             | 9.73 (7.26)                         |
| Range                                                  | -4.50, 21.00             | -10.50, 18.00                       |

<sup>a</sup> Subset of data (n=6 jockeys; n=7 track-work riders).

Supplementary table 2: Strength and muscular (alactic) power of jockeys and track-work riders in Tasmania

| <b>Study factor</b>                                           | <b>Jockeys<br/>(n=8)</b> | <b>Track-work riders<br/>(n=20)</b> |
|---------------------------------------------------------------|--------------------------|-------------------------------------|
| <b>Unadjusted muscular strength measures</b>                  |                          |                                     |
| Grip strength left (kg)                                       |                          |                                     |
| Median                                                        | 37.50                    | 37.75                               |
| Mean ( $\pm$ SD)                                              | 41.44 (11.03)            | 40.70 (9.46)                        |
| Range                                                         | 30, 64.5                 | 28, 61                              |
| Grip strength right (kg)                                      |                          |                                     |
| Median                                                        | 37.25                    | 40.00                               |
| Mean ( $\pm$ SD)                                              | 41.13 (14.98)            | 42.21 (8.35)                        |
| Range                                                         | 24, 74.5                 | 29, 59.5                            |
| Push strength (kg)                                            |                          |                                     |
| Median                                                        | 29.75                    | 38.75                               |
| Mean ( $\pm$ SD)                                              | 33.63 (12.19)            | 37.90 (10.71)                       |
| Range                                                         | 21, 50.5                 | 13.5, 56.5                          |
| Pull strength (kg)                                            |                          |                                     |
| Median                                                        | 32.75                    | 32.50                               |
| Mean ( $\pm$ SD)                                              | 32.00 (10.98)            | 31.23 (7.27)                        |
| Range                                                         | 18, 54.5                 | 12, 42.5                            |
| Leg/back strength (kg)                                        |                          |                                     |
| Median                                                        | 155.50                   | 162.50                              |
| Mean ( $\pm$ SD)                                              | 173.63 (58.79)           | 171.50 (51.93)                      |
| Range                                                         | 122, 305                 | 86, 291                             |
| <b>Muscular strength measures adjusted for body mass (kg)</b> |                          |                                     |
| Pooled grip strength (kg.kg <sup>-1</sup> )                   |                          |                                     |
| Median                                                        | 0.71                     | 0.62                                |
| Mean ( $\pm$ SD)                                              | 0.74 (0.16)              | 0.62 (0.09)                         |
| Range                                                         | 0.51, 1.05               | 0.47, 0.76                          |
| Push strength (kg.kg <sup>-1</sup> )                          |                          |                                     |
| Median                                                        | 0.56                     | 0.58                                |
| Mean ( $\pm$ SD)                                              | 0.61 (0.19)              | 0.57 (0.15)                         |
| Range                                                         | 0.42, 0.87               | 0.28, 0.80                          |
| Pull strength (kg.kg <sup>-1</sup> )                          |                          |                                     |
| Median                                                        | 0.60                     | 0.48                                |
| Mean ( $\pm$ SD)                                              | 0.57 (0.15)              | 0.48 (0.15)                         |
| Range                                                         | 0.36, 0.82               | 0.25, 0.76                          |
| Leg/back strength (kg.kg <sup>-1</sup> )                      |                          |                                     |
| Median                                                        | 3.02                     | 2.58                                |
| Mean ( $\pm$ SD)                                              | 3.12 (0.78)              | 2.53 (0.49)                         |
| Range                                                         | 2.14, 4.60               | 1.51, 3.22                          |
| <b>Muscular power</b>                                         |                          |                                     |
| Vertical jump height (cm)                                     |                          |                                     |
| Median                                                        | 35.50                    | 27.50                               |
| Mean ( $\pm$ SD)                                              | 35.25 (5.80)             | 27.65 (4.31)                        |
| Range                                                         | 26, 45                   | 21, 36                              |
| Mean alactic power (W)                                        |                          |                                     |
| Median                                                        | 563.3                    | 728.5                               |
| Mean ( $\pm$ SD)                                              | 657.76 (268.42)          | 726.73 (252.64)                     |
| Range                                                         | 425.7, 1239.7            | 322, 1219.2                         |
| Mean alactic power (W.kg <sup>-1</sup> )                      |                          |                                     |
| Median                                                        | 10.97                    | 10.78                               |

|                                          |                  |                  |
|------------------------------------------|------------------|------------------|
| Mean ( $\pm$ SD)                         | 11.11 (2.89)     | 10.70 (2.15)     |
| Range                                    | 6.36, 14.53      | 7.02, 14.34      |
| Peak alactic power (W)                   |                  |                  |
| Median                                   | 5935.75          | 5913.95          |
| Mean ( $\pm$ SD)                         | 5986.68 (465.77) | 5956.88 (430.11) |
| Range                                    | 5253, 6561       | 5370.3, 6800.9   |
| Peak alactic power (W.kg <sup>-1</sup> ) |                  |                  |
| Median                                   | 108.16           | 87.02            |
| Mean ( $\pm$ SD)                         | 109.20 (8.50)    | 90.68 (13.50)    |
| Range                                    | 98.96, 124.95    | 73.92, 127.64    |

Supplementary table 3: Anaerobic (lactic) and aerobic fitness of jockeys and track-work riders in Tasmania

| <b>Study factor</b>                                       | <b>Jockeys<br/>(n=8)</b> | <b>Track-work riders<br/>(n=20)</b> |
|-----------------------------------------------------------|--------------------------|-------------------------------------|
| <b>Anaerobic fitness</b>                                  |                          |                                     |
| Mean power (W)                                            |                          |                                     |
| Median                                                    | 531.38                   | 489.43                              |
| Mean ( $\pm$ SD)                                          | 527.14 (73.17)           | 493.18 (112.37)                     |
| Range                                                     | 415.63, 655.80           | 302.03, 690.46                      |
| Mean power (W.kg <sup>-1</sup> )                          |                          |                                     |
| Median                                                    | 9.65                     | 7.63                                |
| Mean ( $\pm$ SD)                                          | 9.57 (0.82)              | 7.42 (1.37)                         |
| Range                                                     | 8.21, 10.80              | 5.03, 9.38                          |
| Peak power (W)                                            |                          |                                     |
| Median                                                    | 700.00                   | 637.00                              |
| Mean ( $\pm$ SD)                                          | 725.63 (161.81)          | 689.84 (166.00)                     |
| Range                                                     | 557, 1055                | 438, 1053                           |
| Peak power (W.kg <sup>-1</sup> )                          |                          |                                     |
| Median                                                    | 12.84                    | 10.25                               |
| Mean ( $\pm$ SD)                                          | 13.07 (1.67)             | 10.38 (2.04)                        |
| Range                                                     | 11.01, 15.91             | 5.9, 15.02                          |
| Total work (kJ)                                           |                          |                                     |
| Median                                                    | 15.38                    | 14.68                               |
| Mean ( $\pm$ SD)                                          | 15.48 (2.28)             | 14.57 (3.63)                        |
| Range                                                     | 12.46, 19.67             | 8.61, 20.71                         |
| Total work (Joules.kg <sup>-1</sup> )                     |                          |                                     |
| Median                                                    | 283.74                   | 228.88                              |
| Mean ( $\pm$ SD)                                          | 280.63 (20.87)           | 219.23 (45.40)                      |
| Range                                                     | 246.42, 307.52           | 137.01, 281.30                      |
| Fatigue index (%)                                         |                          |                                     |
| Median                                                    | 34.64                    | 40.02                               |
| Mean ( $\pm$ SD)                                          | 37.51 (11.73)            | 40.81 (9.29)                        |
| Range                                                     | 20.77, 55.5              | 21.79, 54.67                        |
| <b>Aerobic fitness</b>                                    |                          |                                     |
| VO <sub>2</sub> (ml.kg <sup>-1</sup> .min <sup>-1</sup> ) |                          |                                     |
| Median                                                    | 49.97                    | 40.87                               |
| Mean ( $\pm$ SD)                                          | 48.55 (5.75)             | 43.18 (8.41)                        |
| Range                                                     | 41.32, 58.56             | 32.76, 61.05                        |
